# Supplementary material for: Strain-specific genome evolution in Trypanosoma cruzi, the agent of Chagas disease
Source: PubMed Central journal article supplement (PMC7872254; doi:10.1371/journal.ppat.1009254), 2021-01-28
Supplement: ppat.1009254.s013.pdf [file ppat.1009254.s013.pdf]

S1 Table. Number of joins and breaks generated by Chicago or Hi-C libraries

|             | Brazil A4 |      | Y C6    |      |
|-------------|-----------|------|---------|------|
|             | Chicago   | Hi-C | Chicago | Hi-C |
| # of breaks | 29        | 4    | 4       | 6    |
| # of joins  | 170       | 135  | 42      | 64   |
