# Supplementary material for: Strain-specific genome evolution in Trypanosoma cruzi, the agent of Chagas disease
Source: PubMed Central journal article supplement (PMC7872254; doi:10.1371/journal.ppat.1009254), 2021-01-28
Supplement: ppat.1009254.s014.pdf [file ppat.1009254.s014.pdf]

S2 Table. Summary of assembly metrics among all available *T. cruzi* genomes assembled by long-read sequencing

| Genome           | DTU  | Method                                  | Total size (Mbp) | Number of contigs or scaffolds | GC (%) | N50 (bp)  | L50 | Largest contig/scaffold length (bp) | # of gaps |
|------------------|------|-----------------------------------------|------------------|--------------------------------|--------|-----------|-----|-------------------------------------|-----------|
| Brazil A4        | TcI  | Illumina, PacBio, Chicago and Hi-C      | 45.56            | 402                            | 51.58  | 914,771   | 17  | 2,738,928                           | 295       |
| Y C6             | TcII | Illumina, PacBio, Chicago and Hi-C      | 47.22            | 262                            | 51.58  | 889,019   | 18  | 2,951,016                           | 106       |
| Dm28c2018 [5]    | TcI  | Illumina and PacBio                     | 53.27            | 636                            | 51.56  | 317,638   | 47  | 1,645,565                           | 0*        |
| Sylvio X10/1 [7] | TcI  | Illumina, PacBio and comparative genome | 41.38            | 47**                           | 51.57  | 1,006,492 | 14  | 3,116,433                           | 1005      |
| Berenice [8]***  | TcII | Illumina and Nanopore                   | 40.80            | 923                            | 51.20  | 156,193   | ND  | 926,516                             | 0*        |
| Bug2148 [6]      | TcV  | PacBio                                  | 55.16            | 929                            | 51.27  | 200,364   | 64  | 1,305,792                           | 0*        |
| TCC [5]          | TcVI | Illumina and PacBio                     | 87.06            | 1236                           | 51.72  | 264,196   | 92  | 1,305,230                           | 0*        |

All sequences were retrieved from TriTrypDB database (<https://tritrypdb.org/tritrypdb/>) release-44.

\*No scaffolding was applied to these genomes, so no gaps were generated.

\*\*47 are not *de novo* assembled contigs or scaffolds, but rather pseudomolecules produced by aligning the core regions of scaffolds to the core regions of CL Brener reference genome. Therefore, although the genome showed higher N50 and lower L50, it left an extensively high number of gaps behind.

\*\*\*Genome sequence is not available.
