# Supplementary material for: Strain-specific genome evolution in Trypanosoma cruzi, the agent of Chagas disease
Source: PubMed Central journal article supplement (PMC7872254; doi:10.1371/journal.ppat.1009254), 2021-01-28
Supplement: ppat.1009254.s016.pdf [file ppat.1009254.s016.pdf]

S4 Table. Assessment of genome assembly and annotation completeness  
using single-copy ortholog benchmarking

|                                | Complete | Fragmented | Missing | Total |
|--------------------------------|----------|------------|---------|-------|
| <b>Using eukaryota dataset</b> |          |            |         |       |
| Brazil A4                      | 224      | 19         | 60      | 303   |
| Y C6                           | 224      | 18         | 61      | 303   |
| Dm28c2018                      | 218      | 21         | 64      | 303   |
| Sylvio X10/1                   | 83       | 63         | 157     | 303   |
| TCC*                           | 224      | 18         | 61      | 303   |
| <b>Using protists dataset</b>  |          |            |         |       |
| Brazil A4                      | 119      | 0          | 96      | 215   |
| Y C6                           | 121      | 1          | 93      | 215   |
| Dm28c2018                      | 111      | 0          | 104     | 215   |
| Sylvio X10/1                   | 35       | 1          | 179     | 215   |
| TCC*                           | 124      | 0          | 91      | 215   |

5 PacBio-assembled genomes with annotation were compared using either 'eukaryota\_odb9' or 'protists\_ensembl' datasets using default parameters. The 'eukaryota\_odb9' dataset contains 303 single-copy genes conserved in 100 eukaryote species, while the 'protists\_ensembl' dataset contains 215 single-copy genes that are present among 33 protist species.

\*Note that TCC is a hybrid strain, so its genome is a mixture of two haplotypes, while all other genomes contain one haplotype.
