# Supplementary material for: Strain-specific genome evolution in Trypanosoma cruzi, the agent of Chagas disease
Source: PubMed Central journal article supplement (PMC7872254; doi:10.1371/journal.ppat.1009254), 2021-01-28
Supplement: ppat.1009254.s018.pdf [file ppat.1009254.s018.pdf]

S6 Table. Copy number of large gene families characterized in the new genomes

|           | <b>TS</b> | <b>MASP</b> | <b>mucin</b> | <b>RHS</b> | <b>GP63</b> | <b>DGF-1</b> |
|-----------|-----------|-------------|--------------|------------|-------------|--------------|
| Brazil A4 | 1647      | 1120        | 700          | 677        | 411         | 242          |
| Y C6      | 1465      | 1061        | 797          | 796        | 427         | 265          |
