# Supplementary material for: Strain-specific genome evolution in Trypanosoma cruzi, the agent of Chagas disease
Source: PubMed Central journal article supplement (PMC7872254; doi:10.1371/journal.ppat.1009254), 2021-01-28
Supplement: ppat.1009254.s019.pdf [file ppat.1009254.s019.pdf]

S7 Table. Annotation summary

|                             | <b>Brazil A4</b> | <b>Y C6</b> |
|-----------------------------|------------------|-------------|
| <b>Protein-coding genes</b> |                  |             |
| Number of gene models       | 18,708           | 17,650      |
| % of the genome             | 55.05            | 53.44       |
| Mean CDS length (bp)        | 1,350            | 1,453       |
| Gene density (genes per Mb) | 407.75           | 372.31      |
| GC (%)                      | 53.66            | 54.13       |
| % of hypothetical proteins  | 40.17            | 38.79       |
| <b>Intergenic regions</b>   |                  |             |
| Mean length (bp)            | 1,102            | 1,251       |
| GC (%)                      | 49.03            | 48.67       |
